# Supplementary material for: Solid-state synthesis of CN-encapsulated CoFe alloy catalysts for mild HMF oxidation to FDCA: insights into the kinetics and mechanism
Source: Royal Society of Chemistry journal article supplement (doi:10.1039/d4dt02890b), 2024-11-26
Supplement: d4dt02890b1.pdf [file d4dt02890b1.pdf]

## **Solid-state synthesis of CN encapsulated CoFe alloy catalysts for mild HMF oxidation to FDCA: Insights to the kinetics and mechanism**

*Beibei Liu,<sup>‡a</sup> Haolan Liu,<sup>‡b</sup> Hui Wang,<sup>a</sup> Zixu Ma,<sup>a</sup> Xianglin Cheng,<sup>\*a</sup> Chun Chang,<sup>a</sup> Renfeng Nie<sup>\*ac</sup>*

<sup>a</sup> School of Chemical Engineering, Henan Center for Outstanding Overseas Scientists, Zhengzhou University, Zhengzhou 450001, China.

<sup>b</sup> Material Research Institute, Henan Academy of Sciences, Zhengzhou 450002, China.

<sup>c</sup> State Key Laboratory of Biocatalysis and Enzyme Engineering, School of Life Sciences, Hubei University, China, 430062, China.

<sup>‡</sup> These authors contributed equally to this work.

E-mail: *rnie@zzu.edu.cn (R.N.), cxl8817@163.com (X. Cheng)*

## Experimental

### Materials

HMF (99%), DFF (98%), HMFCA (98%), FFCA (98%) and FDCA (98%) were purchased from Bide Pharmatech Co., Ltd.  $\text{Zn}(\text{NO}_3)_2 \cdot 6\text{H}_2\text{O}$  (99%) and HCl (99.5%) were purchased from Xilong Scientific Co., Ltd.  $\text{FeCl}_2 \cdot 4\text{H}_2\text{O}$  (99.95%) was purchased from Shanghai Macklin Biochemical Co., Ltd.  $\text{Co}(\text{NO}_3)_2 \cdot 6\text{H}_2\text{O}$  (99%) was purchased from Shanghai Aladdin Reagent Co., Ltd. 2-MeIM (98%) and ammonium formate (99%) were purchased from Shanghai Yien Chemical Technology Co., Ltd., Methanol (99%) and  $\text{NaHCO}_3$  were purchased from Tianjin Yongda Chemical Reagent Co., Ltd. All chemicals were used as received without any further purification.

### Catalyst preparation

The preparation of  $\text{Co}_2\text{Fe}_1@\text{NC}$  involved the solid-phase milling-pyrolysis method. Firstly, 10 mmol  $\text{Zn}(\text{NO}_3)_2 \cdot 6\text{H}_2\text{O}$ , 3.0 mmol  $\text{Co}(\text{NO}_3)_2 \cdot 6\text{H}_2\text{O}$ , 1.5 mmol  $\text{FeCl}_2 \cdot 4\text{H}_2\text{O}$ , and 29 mmol 2-MeIM were mixed via solid-phase milling for 30 minutes. Subsequently, the foaming material was obtained by drying the mixture at 120 °C for 24 hours, then thoroughly ground and pyrolyzed at 800 °C for 2 hours under a nitrogen atmosphere with a heating rate of 5 °C/min. The material was treated with hydrochloric acid (1 mol/L) for 4 hours, followed by diafiltration and ultimately drying under vacuum at 60 °C overnight, which was labeled as  $\text{Co}_2\text{Fe}_1@\text{NC}$ .

### Catalyst characterization

Powder X-ray diffraction (XRD) was performed on a Panalytic Empyrean diffractometer and analyzed using Cu  $K\alpha$  radiation sources (45KV and 40mA) in the  $2\theta$  range of 10-80°.  $\text{N}_2$  physisorption was carried out at -196 °C using the ASAP2460 auto-adsorption analyzer (Micromeritics). Before adsorption measurements were taken, the samples were degassed at 200 °C overnight. The total pore volume was determined from the aggregation of  $\text{N}_2$  vapor adsorbed at a relative pressure of 0.99. The specific surface area was calculated using the B.E.T. method, and the pore size was estimated using BJH method from the desorption branch of the isotherms. X-ray photoelectron

spectroscopy (XPS) was conducted on a Kratos XSAM800 spectrometer, with all binding energies calibrated against the C1s peak at 284.6 eV. The contents of Co and Fe were determined by Thermo Scientific iCAP PRO X inductively coupled plasma - optical emission spectroscopy (ICP-OES). Transmission electron microscopy (TEM) images were obtained using an accelerating voltage of 200 kV on a JEOL-135 2010F Transmission Electron Microscope. Scanning TEM (STEM) images were recorded using the FEI Titan G260-300 Transmission Electron Microscope operated at 200 kV.

Chemisorption measurements were conducted using an Auto Chem II 2920 instrument (Micromeritics, USA) equipped with a thermal conductivity detector (TCD). For O<sub>2</sub>-TPR, 100 mg of the catalyst was pretreated at 200 °C under an Ar atmosphere for 1 hour, followed by cooling to room temperature. The sample was then exposed to O<sub>2</sub> for 1 hour and swept with Ar for 1 hour. Subsequently, the sample was heated to 700 °C at a rate of 10 °C/min under an Ar atmosphere, and the desorbed O<sub>2</sub> signal was collected using a TCD detector.

### **Catalyst test**

The HMF oxidation was conducted in a 50 mL stainless steel autoclave with a glass liner. Initially, HMF (0.25 mmol), NaHCO<sub>3</sub> (0.5 mmol), catalyst (60 mg), and H<sub>2</sub>O (3 mL) were added. The reactor was purged with 0.1 MPa O<sub>2</sub> five times, and then pressurized to the specified pressure and heated to the desired reaction temperature. After the reaction, the reactor was rapidly cooled, 0.1 mL aliquots were collected and diluted 50 times. The filtrates were filtered and analyzed using high-performance liquid chromatography (Agilent Infinity Lab HPLC) at 30 °C with a C18 column and UV detector. The mobile phase consisted of a 5 mM ammonium formate aqueous solution and methanol (70:30, v/v), flowing at a rate of 1 mL/min. The UV detector was set to an absorption wavelength of 256 nm for HMFCFA and FDCA, 284 nm for HMF, and 290 nm for FFCA and DFF. The catalyst was recovered by diafiltration, washed with H<sub>2</sub>O (500 mL), dried overnight in a vacuum at 60 °C, and then treated at 300 °C in H<sub>2</sub> flow for 1 h. The HMF conversion and product yields were determined based on the

external standard method.

$$(1) \text{ HMF conversion (\%)} = \left(1 - \frac{\text{Moles of unreacted HMF}}{\text{Initial moles of HMF}}\right) \times 100\%$$

$$(2) \text{ Product yield (\%)} = \frac{\text{Moles of obtained products}}{\text{HMF mole before the reaction}} \times 100\%$$

$$(3) \text{ Product selectivity (\%)} = \frac{\text{Product yield}}{\text{HMF conversion}} \times 100\%$$

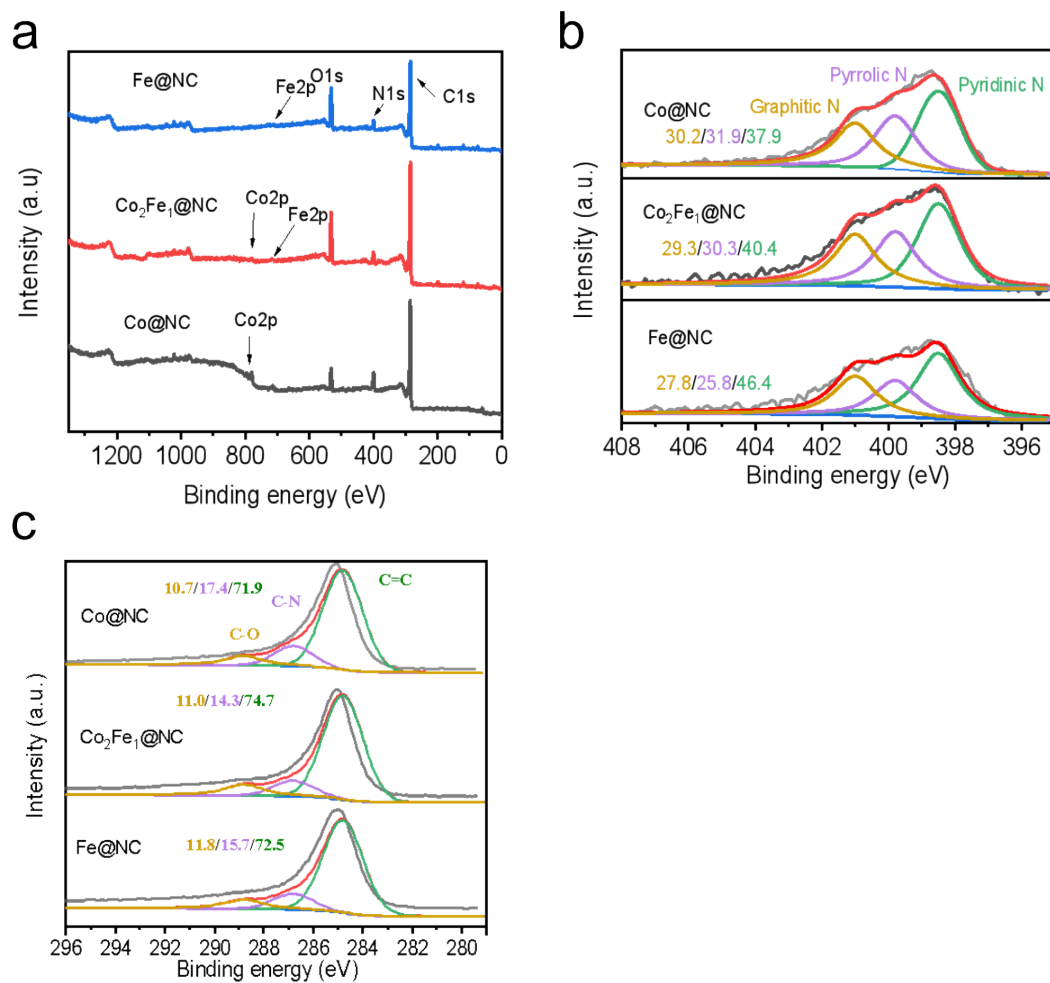

**Fig. S1** XPS spectra of Co<sub>x</sub>Fe<sub>y</sub>@NC catalyst: (a) full spectrum, (b) N 1s, and (c) O 1s.

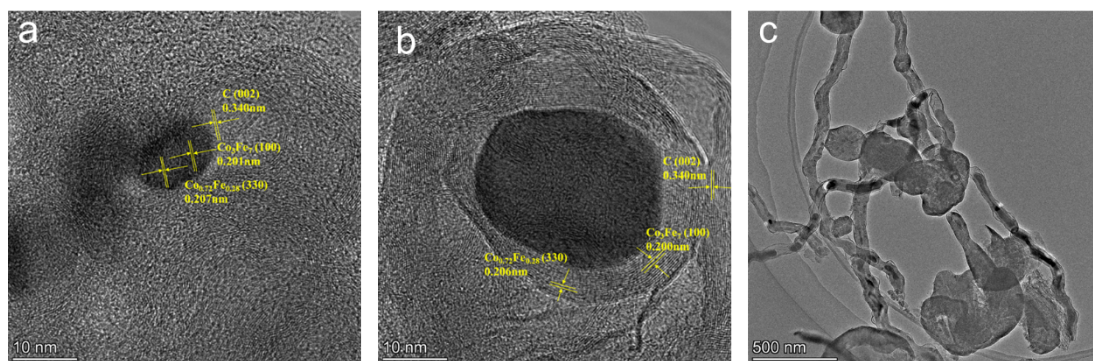

**Fig. S2** (a-b)TEM images of (a-b) Co<sub>2</sub>Fe<sub>1</sub>@NC, (c) Fe@NC.

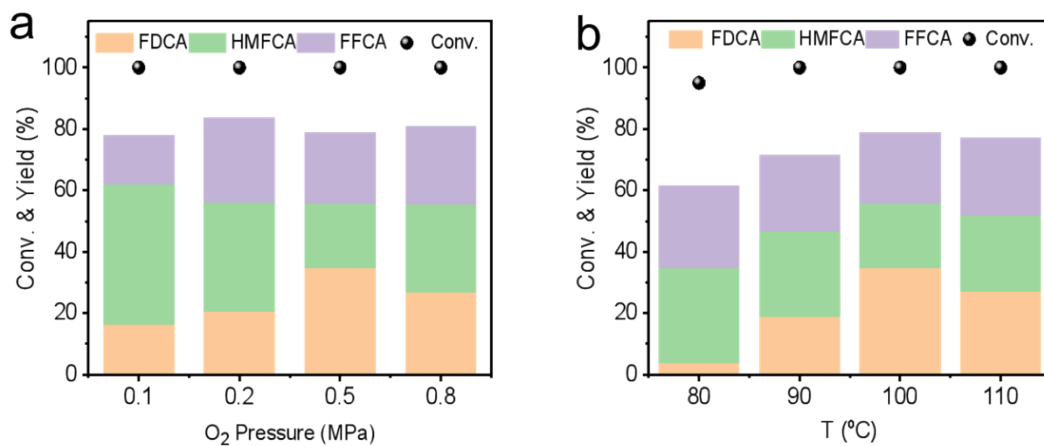

**Fig. S3** Catalyst screening for HMF oxidation at 2 h over  $\text{Co}_2\text{Fe}_1@\text{NC}$ . The influences of (a) reaction temperature and (b) reaction pressure on HMF oxidation over  $\text{Co}_2\text{Fe}_1@\text{NC}$  (Reaction conditions: HMF 0.25 mmol,  $\text{Co}_2\text{Fe}_1@\text{NC}$  60 mg,  $\text{NaHCO}_3$  0.5 mmol,  $\text{H}_2\text{O}$  3 mL; a: 100 °C; b: 0.5 MPa  $\text{O}_2$ ).

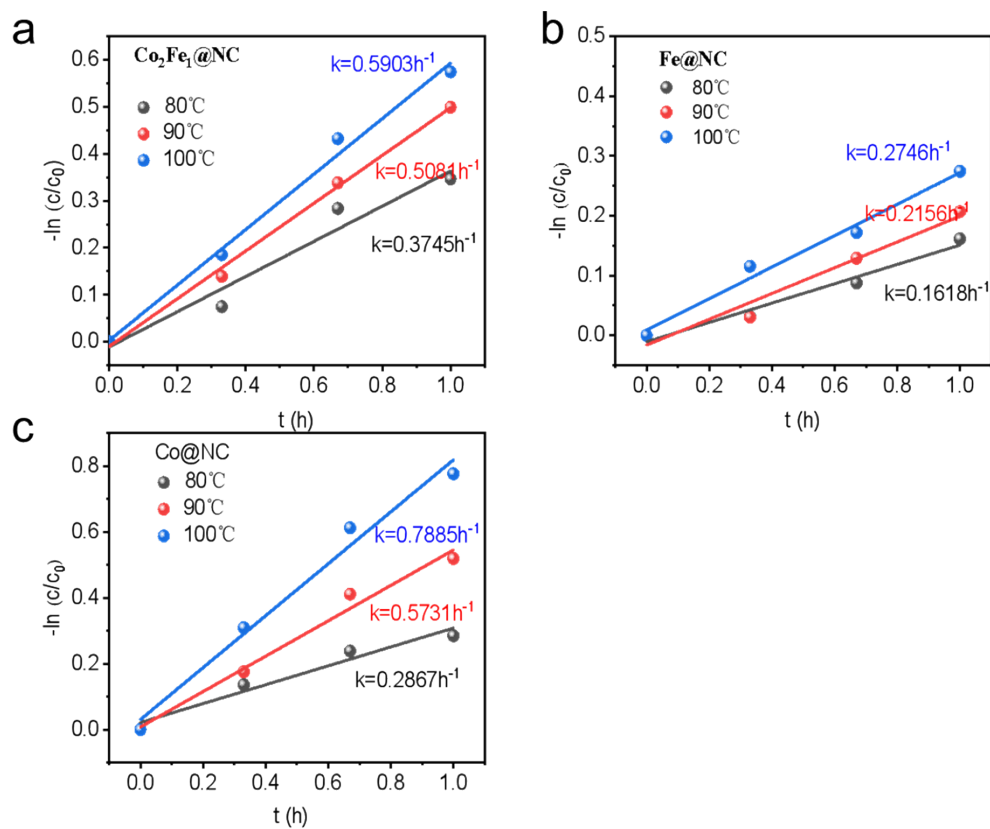

**Fig. S4** Time–conversion plots of FFCA oxidation at various temperatures for  $\text{Co}_2\text{Fe}_1@\text{NC}$ ,  $\text{Fe}@\text{NC}$ , and  $\text{Co}@\text{NC}$  catalysts (Reaction conditions: FFCA 0.25 mmol, catalyst 60 mg,  $\text{NaHCO}_3$  0.5 mmol,  $\text{H}_2\text{O}$  3 mL, 0.5 MPa  $\text{O}_2$ ).



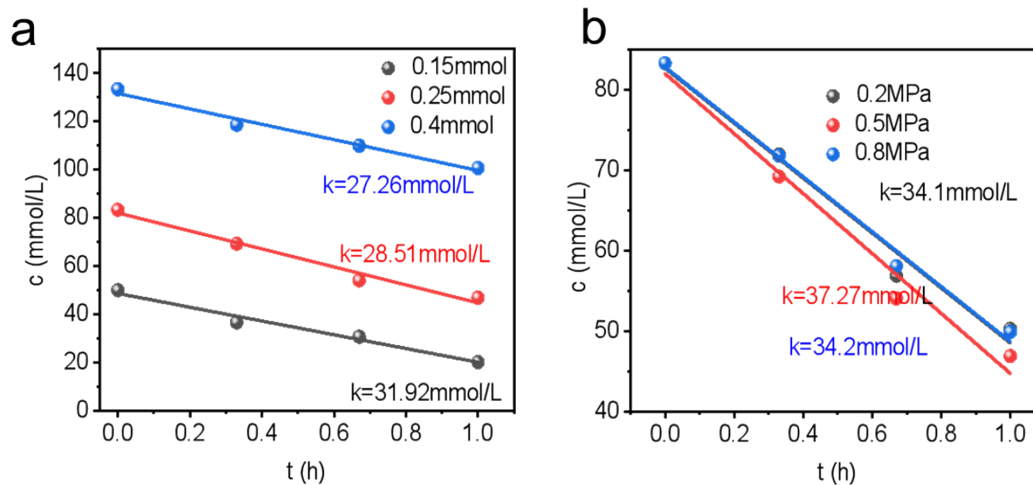

**Fig. S5** Measurement of rate orders of (a) FFCA concentration and (b) O<sub>2</sub> pressure for the Co<sub>2</sub>Fe<sub>1</sub>@NC.

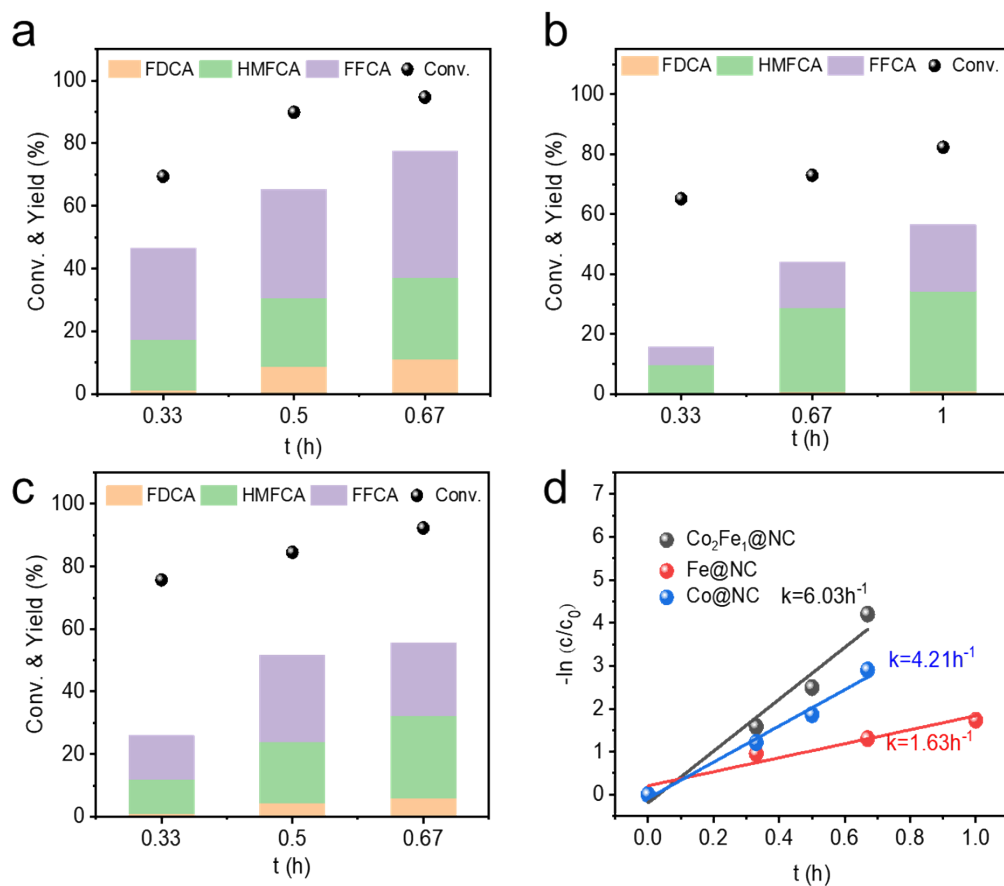

**Fig. S6** The reaction time profiles of HMF on different catalysts: (a) Co<sub>2</sub>Fe<sub>1</sub>@NC, (b) Fe@NC, (c) Co@NC, and (d) Time–conversion plots of HMF oxidation for Co<sub>2</sub>Fe<sub>1</sub>@NC, Fe@NC, and Co@NC catalysts (Reaction conditions: HMF 0.25 mmol, catalyst 60 mg, NaHCO<sub>3</sub> 0.5 mmol, H<sub>2</sub>O 3 mL, 0.5 MPa O<sub>2</sub>, 100 °C).

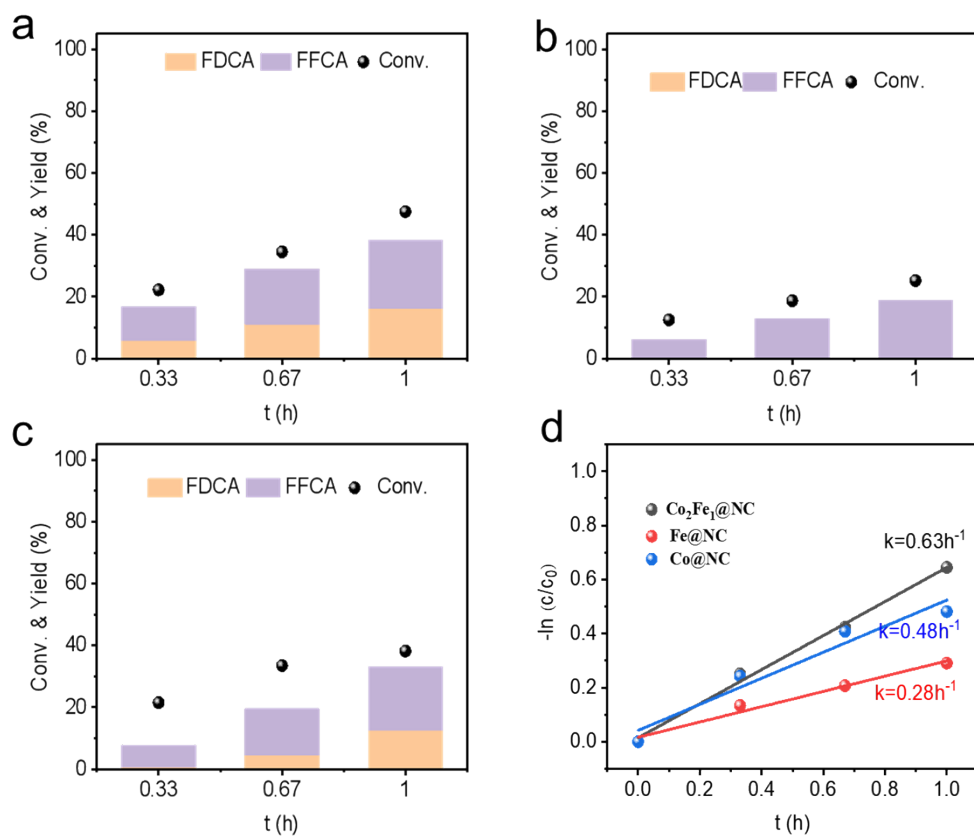

**Fig. S7** The reaction time profiles of HMFCFA on different catalysts: (a)  $\text{Co}_2\text{Fe}_1@\text{NC}$ , (b)  $\text{Fe}@\text{NC}$ , (c)  $\text{Co}@\text{NC}$ , and (d) Time-conversion plots of HMFCFA oxidation for  $\text{Co}_2\text{Fe}_1@\text{NC}$ ,  $\text{Fe}@\text{NC}$ , and  $\text{Co}@\text{NC}$  catalysts (Reaction conditions: HMFCFA 0.25 mmol, catalyst 60 mg,  $\text{NaHCO}_3$  0.5 mmol,  $\text{H}_2\text{O}$  3 mL, 0.5 MPa  $\text{O}_2$ , 100 °C).

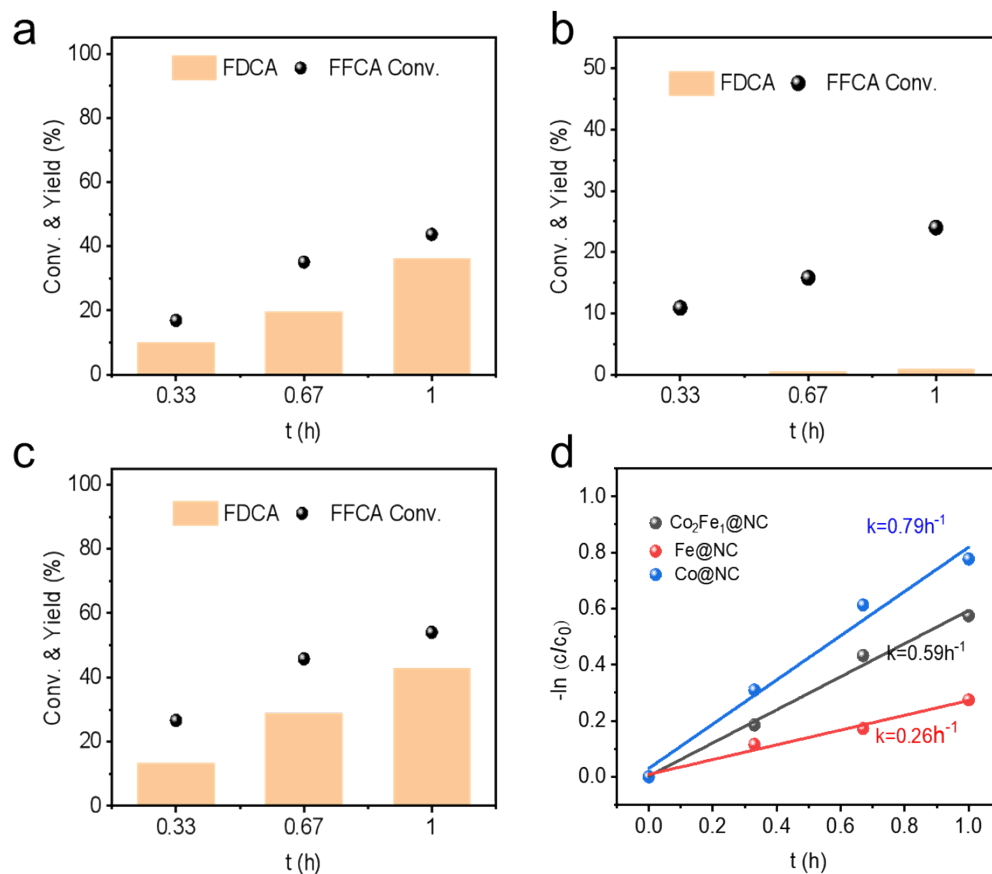

**Fig. S8** The reaction time profiles of FFCA on different catalysts: (a)  $\text{Co}_2\text{Fe}_1@\text{NC}$ , (b)  $\text{Fe}@\text{NC}$ , (c)  $\text{Co}@\text{NC}$ , and (d) Time–conversion plots of FFCA oxidation for  $\text{Co}_2\text{Fe}_1@\text{NC}$ ,  $\text{Fe}@\text{NC}$ , and  $\text{Co}@\text{NC}$  catalysts (Reaction conditions: FFCA 0.25 mmol, catalyst 60 mg,  $\text{NaHCO}_3$  0.5 mmol,  $\text{H}_2\text{O}$  3 mL, 0.5 MPa  $\text{O}_2$ , 100 °C).

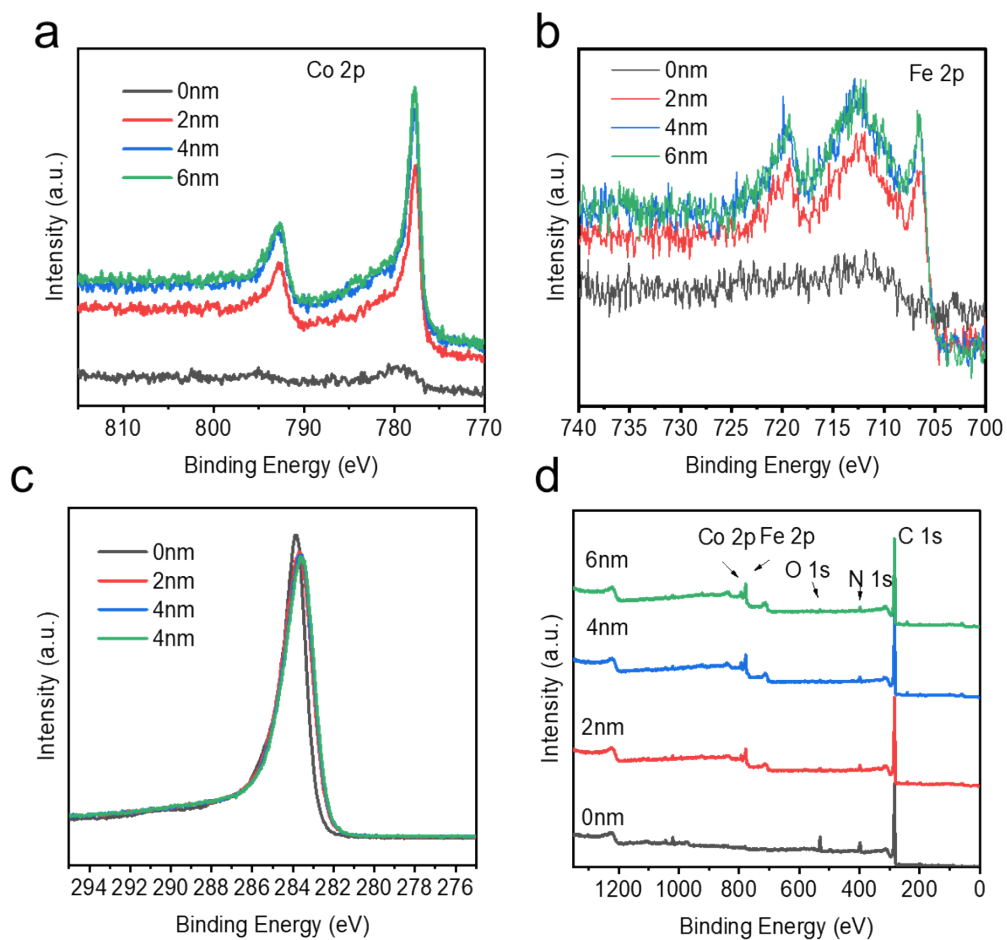

**Fig. S9.** Ar ion sputtering profile of the  $\text{Co}_2\text{Fe}_1@\text{NC}$ .

**Table S1.** Physical property data of Co and Fe-based catalysts.

| Catalyst                            | S <sub>BET</sub> (m <sup>2</sup> /g) | V <sub>total</sub> (cm <sup>3</sup> /g) | Pore size (nm) |
|-------------------------------------|--------------------------------------|-----------------------------------------|----------------|
| Co@NC                               | 328                                  | 0.126                                   | 6.5            |
| Co <sub>3</sub> Fe <sub>1</sub> @NC | 330                                  | 0.182                                   | 7.2            |
| Co <sub>2</sub> Fe <sub>1</sub> @NC | 372                                  | 0.141                                   | 4.9            |
| Co <sub>1</sub> Fe <sub>2</sub> @NC | 386                                  | 0.089                                   | 3.4            |
| Fe@NC                               | 510                                  | 0.131                                   | 3.8            |

**Table S2.** Metal content of Co and Fe based catalysts.

| Catalyst                            | Metal loading (wt%) |      |
|-------------------------------------|---------------------|------|
|                                     | Co                  | Fe   |
| Co@NC                               | 38.8                | 0    |
| Co <sub>2</sub> Fe <sub>1</sub> @NC | 14.2                | 5.67 |
| Fe@NC                               | 0                   | 8.7  |

**Table S3.** The element content obtained from XPS analysis in the catalysts.

| Catalyst                            | Content/at% |      |       |       |       |
|-------------------------------------|-------------|------|-------|-------|-------|
|                                     | Co          | Fe   | N     | C     | O     |
| Co@NC                               | 1.35        | 0    | 10.95 | 79.94 | 7.75  |
| Co <sub>2</sub> Fe <sub>1</sub> @NC | 0.51        | 0.20 | 6.58  | 79.15 | 13.55 |
| Fe@NC                               | 0           | 0.57 | 7.29  | 76.37 | 16.08 |



**Table S4.** The crystallite sizes of nanoparticles in different  $\text{Co}_x\text{Fe}_y\text{@NC}$  catalysts

| Catalysts                          | Sizes of nanoparticles (nm) |
|------------------------------------|-----------------------------|
| $\text{Co}_1\text{Fe}_2\text{@NC}$ | 21.0                        |
| $\text{Co}_1\text{Fe}_1\text{@NC}$ | 18.9                        |
| $\text{Co}_2\text{Fe}_1\text{@NC}$ | 19.3                        |
| $\text{Co}_3\text{Fe}_1\text{@NC}$ | 19.9                        |

**Table S5.** Comparison of oxidation performances for HMF of reported catalysts.

| Catalyst                                              | T (°C) | O <sub>2</sub> pressure | Yield (%) | Ref.      |
|-------------------------------------------------------|--------|-------------------------|-----------|-----------|
| Fe <sub>0.6</sub> Zr <sub>0.4</sub> O <sub>2</sub>    | 160    | 2 MPa                   | 60.6      | 1         |
| Pd/CC                                                 | 140    | 1 MPa                   | 85        | 2         |
| Ag <sub>1.5</sub> Pd <sub>1.5</sub> /CeO <sub>2</sub> | 20     | 0.1 MPa                 | 93        | 3         |
| Ru/C                                                  | 140    | 4 MPa                   | 98        | 4         |
| CoCe-0.15                                             | 130    | 0.6 MPa                 | 86.3      | 5         |
| (Co <sub>1</sub> →Co <sub>p</sub> )/N-CNTs            | 100    | 0.1 MPa                 | 96        | 6         |
| Mn <sub>3</sub> Co <sub>2</sub> O <sub>x</sub> -0.3VC | 130    | 1.5 MPa Air             | 96        | 7         |
| Co <sub>2</sub> Fe <sub>1</sub> @NC                   | 100    | 0.5 MPa                 | 96.1      | This work |

Table S6 Different methods of treating Co<sub>2</sub>Fe<sub>1</sub>@NC catalyst

| Entry              | Conv. (%) | Yield (%) |        |      |     |
|--------------------|-----------|-----------|--------|------|-----|
|                    |           | FDCA      | HMFCFA | FFCA | DFC |
| Fresh              | 100       | 70.4      | 11.9   | 15.8 | 0   |
| Run 2 <sup>a</sup> | 100       | 62.2      | 13.0   | 14.6 | 0   |
| Run 2 <sup>b</sup> | 100       | 61.8      | 12.1   | 17.6 | 0   |
| Run 2 <sup>c</sup> | 100       | 68.2      | 12.9   | 7.9  | 0   |

<sup>a</sup>Treated with water and NaHCO<sub>3</sub> at 100 °C, <sup>b</sup> Without treatment of water and NaHCO<sub>3</sub> at 100 °C, <sup>c</sup> Treated with hydrogen at 300 °C.

## References

- 1 D. Yan, J. Xin, Q. Zhao, K. Gao, X. Lu, G. Wang, S. Zhang, Fe–Zr–O catalyzed base-free aerobic oxidation of 5-HMF to 2,5-FDCA as a bio-based polyester monomer, *Catalysis Science & Technology*, 8 (2018) 164-175.
- 2 P.V. Rathod, V.H. Jadhav, Efficient Method for Synthesis of 2,5-Furandicarboxylic Acid from 5-Hydroxymethylfurfural and Fructose Using Pd/CC Catalyst under Aqueous Conditions, *ACS Sustainable Chemistry & Engineering*, 6 (2018) 5766-5771.
- 3 X. Wan, C. Zhou, J. Chen, W. Deng, Q. Zhang, Y. Yang, Y. Wang, Base-Free Aerobic Oxidation of 5-Hydroxymethyl-furfural to 2,5-Furandicarboxylic Acid in Water Catalyzed by Functionalized Carbon Nanotube-Supported Au–Pd Alloy Nanoparticles, *ACS Catalysis*, 4 (2014) 2175-2185.
- 4 L. Zheng, J. Zhao, Z. Du, B. Zong, H. Liu, Efficient aerobic oxidation of 5-hydroxymethylfurfural to 2,5-furandicarboxylic acid on Ru/C catalysts, *Science China Chemistry*, 60 (2017) 950-957.
- 5 M. Jin, L. Yu, H. Chen, X. Ma, K. Cui, Z. Wen, Z. Ma, Y. Sang, M. Chen, Y. Li, Base-free selective conversion of 5-hydroxymethylfurfural to 2,5-furandicarboxylic acid over a CoO<sub>x</sub>-CeO<sub>2</sub> catalyst, *Catalysis Today*, 367 (2021) 2-8.
- 6 S. Yang, C. Wu, J. Wang, H. Shen, K. Zhu, X. Zhang, Y. Cao, Q. Zhang, H. Zhang, Metal Single-Atom and Nanoparticle Double-Active-Site Relay Catalysts: Design, Preparation, and Application to the Oxidation of 5-Hydroxymethylfurfural, *ACS Catalysis*, 12 (2022) 971-981.
- 7 H. Liu, W. Jia, X. Yu, X. Tang, X. Zeng, Y. Sun, T. Lei, H. Fang, T. Li, L. Lin, Vitamin C-Assisted Synthesized Mn–Co Oxides with Improved Oxygen Vacancy Concentration: Boosting Lattice Oxygen Activity for the Air-Oxidation of 5-(Hydroxymethyl)furfural, *ACS Catalysis*, 11 (2021) 7828-7844.
